# Supplementary material for: Validation of reference genes for quantitative RT-PCR normalization in Suaeda aralocaspica, an annual halophyte with heteromorphism and C4 pathway without Kranz anatomy
Source: PeerJ. 2016 Feb 11;4:e1697. doi: 10.7717/peerj.1697 (PMC4756755; doi:10.7717/peerj.1697)
Supplement: Data S2 [file peerj-04-1697-s010.xls]

## Sheet: PPDK-NaCl
Relative quantification of PPDK expression using the selected reference gene(s)
PPDK-GAPDH
	A:Y1	A:Y2	A:Y3	A:Y4	A:Y5	A:Y6	A:Y7	A:Y8	B:Y1	B:Y2	B:Y3	B:Y4	B:Y5	B:Y6	B:Y7	B:Y8
	Br seed								Bl seed
0	0.804534	1.9684	0.934805	1.44366	0.581757	1.00258	0.656746	0.60751	1.4307	1.32889	0.934739	1.02755	1.06033	1.24535	0.471001	0.501437
1d	200.512	167.855	202.636	189.286	169.666	147.367	120.206	100.727	0.315452	0.301544	0.293646	0.248917	0.357858	0.28179	0.212621	0.223354
7d	731.088	609.084	755.46	807.192	768.56	698.041	751.703	704.772	62.6999	64.2921	41.2022	44.673	47.8049	50.011	37.2189	43.4062
PPDK-ACTIN
	A:Y1	A:Y2	A:Y3	A:Y4	A:Y5	A:Y6	A:Y7	A:Y8	B:Y1	B:Y2	B:Y3	B:Y4	B:Y5	B:Y6	B:Y7	B:Y8
	Br seed								Bl seed
0	0.782469	1.8121	1.06491	1.79646	0.536033	0.978083	0.529218	0.500729	1.12878	1.68017	0.823201	0.787819	1.05928	1.09793	0.668144	0.754675
1d	164.286	117.037	167.962	148.632	222.562	182.123	149.596	114.177	0.557871	0.559247	0.548154	0.530296	0.342908	0.403638	0.32975	0.355083
7d	782.134	676.133	787.815	840.787	652.129	650.891	446.477	353.97	73.3185	71.834	74.476	76.5571	73.9741	78.9271	62.7474	56.6924
PPDK-(GAPDH+ACTIN)
	A:Y1	A:Y2	A:Y3	A:Y4	A:Y5	A:Y6	A:Y7	A:Y8	B:Y1	B:Y2	B:Y3	B:Y4	B:Y5	B:Y6	B:Y7	B:Y8
	Br seed								Bl seed
0	0.795414	1.89337	1.00024	1.61447	0.559827	0.992738	0.591021	0.552924	1.27924	1.50416	0.883022	0.90571	1.06684	1.17708	0.564702	0.619243
1d	181.953	140.513	302.247	293.254	194.81	164.237	134.434	107.51	0.396296	0.399144	0.281691	0.25337	0.490402	0.439718	0.295047	0.324722
7d	758.076	640.755	776.524	825.884	709.73	675.744	444.048	348.908	61.3497	61.7886	54.8937	59.8009	65.4653	71.2307	43.4919	55.8541
PPDK-18S
	A:Y1	A:Y2	A:Y3	A:Y4	A:Y5	A:Y6	A:Y7	A:Y8	B:Y1	B:Y2	B:Y3	B:Y4	B:Y5	B:Y6	B:Y7	B:Y8
	Br seed								Bl seed
0	0.874174	0.975055	0.622412	1.41361	1.07907	1.03568	0.858553	1.14145	0.363603	0.447056	0.98912	1.31577	1.49443	1.39002	0.949052	1.05095
1d	154.051	149.04	169.397	160.365	138.245	135.855	153.898	148.42	0.489786	0.456229	0.187209	0.160549	0.702745	0.666229	0.459913	0.427669
7d	16596.6	25925	52588.5	62170.8	409.718	387.752	23198.3	29494.5	5020.53	6103.03	4946.65	6059.78	8146.3	8351.11	6037.83	6837.97
PPDK-28S
	A:Y1	A:Y2	A:Y3	A:Y4	A:Y5	A:Y6	A:Y7	A:Y8	B:Y1	B:Y2	B:Y3	B:Y4	B:Y5	B:Y6	B:Y7	B:Y8
	Br seed								Bl seed
0	1.39461	1.50595	0.488592	0.501716	1.11846	0.990668	1.00056	0.999446	0.14946	0.16996	0.166665	0.258868	2.26233	2.99272	0.859485	1.14052
1d	94.1304	87.4136	46.3772	47.7278	148.674	140.734	96.3939	91.9584	0.179786	0.120999	0.0435243	0.0542756	0.644025	0.353315	0.289112	0.176197
7d	23001	13770.1	14364.3	11092.4	100.516	77.3383	12488.6	8313.29	2509.05	2093.55	2501.07	2353.82	2653.46	2443.26	2554.53	2296.88

## Sheet: PPDK-H2O
Relative quantification of PPDK expression using the selected reference gene(s)
PPDK-GAPDH
	A:Y1	A:Y2	A:Y3	A:Y4	A:Y5	A:Y6	A:Y7	A:Y8	B:Y1	B:Y2	B:Y3	B:Y4	B:Y5	B:Y6	B:Y7	B:Y8
	Br seed								Bl seed
0	0.992619	0.910645	1.09034	1.68386	0.678549	1.16939	0.766015	0.708588	1.26438	1.17441	0.826073	0.9081	0.937064	1.10058	0.873948	0.915457
1d	610.7	558.723	389.408	654.087	606.479	440.798	453.426	463.268	0.281643	0.31126	0.440282	0.20612	0.414982	0.327433	0.576313	0.547172
7d	386.945	440.021	451.901	409.725	304.22	325.413	388.022	314.288	19.9693	22.6362	22.5377	27.0923	41.7514	34.8603	40.6647	40.162
PPDK-ACTIN
	A:Y1	A:Y2	A:Y3	A:Y4	A:Y5	A:Y6	A:Y7	A:Y8	B:Y1	B:Y2	B:Y3	B:Y4	B:Y5	B:Y6	B:Y7	B:Y8
	Br seed								Bl seed
0	0.978225	0.841195	1.21762	2.05407	0.612901	1.11834	0.605108	0.572534	1.07046	1.59337	0.780673	0.747119	1.00456	1.04121	0.830365	0.932243
1d	395.916	722.466	172.831	377.479	688.744	656.604	549.777	629.492	1.83756	1.44555	1.58885	0.910227	1.73586	1.56349	1.7915	1.69695
7d	746.719	704.707	414.192	502.151	219.404	251.817	194.466	189.203	38.3197	43.9619	44.7505	54.0947	38.1053	41.0888	84.4458	62.4071
PPDK-(GAPDH+ACTIN)
	A:Y1	A:Y2	A:Y3	A:Y4	A:Y5	A:Y6	A:Y7	A:Y8	B:Y1	B:Y2	B:Y3	B:Y4	B:Y5	B:Y6	B:Y7	B:Y8
	Br seed								Bl seed
0	0.988007	0.87755	1.15528	1.8647	0.646599	1.14661	0.682628	0.638626	1.16711	1.37232	0.805624	0.826324	0.97333	1.07391	0.854606	0.92677
1d	493.02	637.025	260.113	498.211	648.016	539.412	500.606	541.452	0.721704	0.816572	0.839067	0.434534	0.851453	0.717791	1.01936	1.04226
7d	538.955	558.329	433.782	454.792	259.039	287.018	275.422	244.499	27.7511	31.6467	31.8598	38.4051	40.0144	37.9679	58.7877	50.2242

## Sheet: SAT-NaCl
Relative quantification of SAT expression using the selected reference gene(s)
SAT-GAPDH
	A:Y1	A:Y2	A:Y3	A:Y4	A:Y5	A:Y6	A:Y7	A:Y8	B:Y1	B:Y2	B:Y3	B:Y4	B:Y5	B:Y6	B:Y7	B:Y8
	Br seed								Bl seed
0	0.784624	0.76913	1.75575	1.64143	1.09265	1.13993	0.405264	0.411217	0.425406	0.388547	0.518021	0.548091	0.587622	0.664261	2.36909	2.49897
1d	1.55773	1.67663	2.06774	2.19949	1.60554	1.75069	1.28493	1.455	2.64972	2.98891	1.52779	1.65618	1.78012	1.84429	1.58139	2.16612
7d	5.92299	5.38399	6.27963	5.93564	5.85438	5.2011	5.27048	4.68293	15.1141	15.143	12.6207	13.62	14.6915	14.9849	14.8499	14.3514
SAT-ACTIN
	A:Y1	A:Y2	A:Y3	A:Y4	A:Y5	A:Y6	A:Y7	A:Y8	B:Y1	B:Y2	B:Y3	B:Y4	B:Y5	B:Y6	B:Y7	B:Y8
	Br seed								Bl seed
0	0.735683	0.682611	1.92824	1.96916	0.970598	1.07211	0.314834	0.326758	0.268568	0.393096	0.365051	0.336252	0.469741	0.468611	2.68918	3.0095
1d	1.23043	1.12703	4.41283	5.06414	2.03041	2.08584	1.54162	1.59001	3.30232	4.20602	1.37283	1.89049	2.63984	2.87076	1.91952	3.18868
7d	10.3324	9.4791	7.95318	7.85749	3.83226	3.766	3.11292	2.60026	15.6036	17.2438	15.1546	18.1693	17.6651	21.7665	14.2782	16.6008
SAT-(GAPDH+ACTIN)
	A:Y1	A:Y2	A:Y3	A:Y4	A:Y5	A:Y6	A:Y7	A:Y8	B:Y1	B:Y2	B:Y3	B:Y4	B:Y5	B:Y6	B:Y7	B:Y8
	Br seed								Bl seed
0	0.761545	0.726283	1.8443	1.80207	1.03224	1.1081	0.358038	0.367424	0.340446	0.393632	0.437996	0.432393	0.529174	0.561947	2.54226	2.76215
1d	1.38769	1.37786	3.02779	3.34529	1.80977	1.91542	1.41074	1.52459	2.9794	3.57118	1.45868	1.78222	2.1834	2.31757	1.75483	2.64708
7d	7.84134	7.16069	7.08365	6.84534	4.74775	4.43616	4.06003	3.49773	15.4676	16.2758	13.9295	15.8445	16.226	18.1903	14.6662	15.5465
SAT-18S
	A:Y1	A:Y2	A:Y3	A:Y4	A:Y5	A:Y6	A:Y7	A:Y8	B:Y1	B:Y2	B:Y3	B:Y4	B:Y5	B:Y6	B:Y7	B:Y8
	Br seed								Bl seed
0	0.764868	0.779613	1.0488	1.44198	0.908281	1.05646	0.907315	1.09268	0.207563	0.37085	0.571699	0.519532	2.06881	2.26155	0.949356	1.05064
1d	1.30767	1.42942	1.76347	1.66175	2.0361	2.35249	1.70242	1.81455	1.93398	2.12581	0.792206	0.853482	1.6433	2.04977	1.45649	1.67635
7d	146.918	250.398	477.638	499.531	3.41015	3.15685	209.322	251.029	568.909	675.738	712.287	868.494	1176.88	1176.28	819.36	906.838
SAT-28S
	A:Y1	A:Y2	A:Y3	A:Y4	A:Y5	A:Y6	A:Y7	A:Y8	B:Y1	B:Y2	B:Y3	B:Y4	B:Y5	B:Y6	B:Y7	B:Y8
	Br seed								Bl seed
0	0.888379	0.833727	1.30022	1.21933	0.808246	0.950106	0.998947	1.00105	0.0839919	0.0939197	0.174566	0.260965	2.36957	3.01696	0.876042	1.12395
1d	0.848403	0.873344	0.537442	0.565032	0.959683	1.84378	0.781843	1.09405	0.463945	0.368458	0.0994509	0.161711	0.984206	0.710412	0.515867	0.413527
7d	216.192	141.217	138.525	94.6323	0.761422	0.783303	118.493	78.8775	185.81	151.489	235.362	220.47	250.525	224.906	223.899	198.955

## Sheet: SAT-H2O
Relative quantification of SAT expression using the selected reference gene(s)
SAT-GAPDH
	A:Y1	A:Y2	A:Y3	A:Y4	A:Y5	A:Y6	A:Y7	A:Y8	B:Y1	B:Y2	B:Y3	B:Y4	B:Y5	B:Y6	B:Y7	B:Y8
	Br seed								Bl seed
0	0.773463	0.871987	1.73077	1.61809	1.07711	1.12371	0.3995	0.405367	0.425406	0.388547	0.518021	0.548091	0.587622	0.664261	2.36909	2.49897
1d	3.55355	3.03054	5.11555	5.09091	3.66825	3.26593	3.20647	4.19329	5.01986	3.81048	4.07372	4.397	3.98474	3.99295	3.09398	3.79968
7d	8.02854	9.26977	10.0869	9.36362	6.60216	6.36638	9.05956	9.2134	18.5302	19.0054	18.0525	19.5969	20.8035	20.0192	19.092	19.5361
SAT-ACTIN
	A:Y1	A:Y2	A:Y3	A:Y4	A:Y5	A:Y6	A:Y7	A:Y8	B:Y1	B:Y2	B:Y3	B:Y4	B:Y5	B:Y6	B:Y7	B:Y8
	Br seed								Bl seed
0	0.728858	0.750499	1.91035	1.95089	0.961593	1.06217	0.311913	0.323726	0.268568	0.393096	0.365051	0.336252	0.469741	0.468611	2.68918	3.0095
1d	2.27698	3.87313	2.24404	2.90385	4.1174	4.80832	3.84264	5.63164	24.4225	19.4312	10.9623	14.4791	12.4291	14.2175	7.17188	10.2148
7d	15.3132	14.6732	9.13772	11.3424	4.70614	4.86926	4.48762	5.48205	26.5153	27.5238	26.7289	29.1778	14.1581	17.5952	10.5827	8.74725
SAT-(GAPDH+ACTIN)
	A:Y1	A:Y2	A:Y3	A:Y4	A:Y5	A:Y6	A:Y7	A:Y8	B:Y1	B:Y2	B:Y3	B:Y4	B:Y5	B:Y6	B:Y7	B:Y8
	Br seed								Bl seed
0	0.75268	0.81096	1.82283	1.78109	1.02022	1.0952	0.35387	0.363147	0.340446	0.393632	0.437996	0.432393	0.529174	0.561947	2.54226	2.76215
1d	2.85154	3.43447	3.39649	3.85438	3.89592	3.97255	3.51882	4.87151	11.1522	8.66682	6.73078	8.03653	7.08827	7.5889	4.74456	6.27492
7d	11.1153	11.6914	9.62424	10.331	5.58785	5.58145	6.39191	7.12444	22.3259	23.0363	22.1248	24.0847	17.2858	18.9034	14.3167	13.1666
